# Supplementary material for: Wie wirkt sich mehrmaliges Kompetenz-Feedback auf psychotherapeutische Behandlungen aus?
Source: Atypon-hosted journal article supplement (doi:10.1026/1616-3443/a000412), 2017-04-01
Supplement: 1616-3443_a000412_esm1.pdf [file 1616-3443_a000412_esm1.pdf]

## Elektronisches Supplement 1. Interviewleitfaden Feedback

Titel des Beitrags: „Wie wirkt sich mehrmaliges Kompetenz-Feedback auf psychotherapeutische Behandlungen aus? Eine qualitative Analyse“

Kaufmann, Y.M., Maiwald, L., Schindler S. & Weck, F.

|                          |                       |                                                                                                                                        |
|--------------------------|-----------------------|----------------------------------------------------------------------------------------------------------------------------------------|
|                          |                       | <b>1. „Erzählen Sie einfach mal, woran Sie sich bezüglich des Feedbacks/der Feedback-Behandlung noch erinnern können.“</b>             |
| <input type="checkbox"/> | <input type="radio"/> | <b>2. „Wie war es für Sie, Feedback zu erhalten?“</b>                                                                                  |
|                          | <input type="radio"/> | 1.) „Was fanden Sie hilfreich?“                                                                                                        |
|                          | <input type="radio"/> | 2.) „Was fanden Sie schwierig oder problematisch?“                                                                                     |
|                          | <input type="radio"/> | 3.) „Was ist Ihnen im Vergleich zu Behandlungen ohne Feedback aufgefallen?“                                                            |
|                          | <input type="radio"/> | 4.) „Wie sind sie mit dem erhaltenen Feedback umgegangen?“                                                                             |
| <input type="checkbox"/> | <input type="radio"/> | <b>3. „Hat das Feedback zu Veränderungen geführt?“</b>                                                                                 |
| <input type="checkbox"/> | <input type="radio"/> | „Welche Auswirkungen hatte das Feedback auf die <b>Therapie</b> ?“                                                                     |
|                          | <input type="radio"/> | 1.) „Wie wurde dadurch die Vorbereitung und Planung der Therapiesitzungen verändert?“                                                  |
|                          | <input type="radio"/> | 2.) „Wie wurde dadurch die Durchführung der Therapiesitzungen verändert?“                                                              |
|                          | <input type="radio"/> | 3.) „Wie wurde dadurch die Nachbereitung der Sitzung verändert?“                                                                       |
|                          | <input type="radio"/> | 4.) „Wie wurde dadurch der Verlauf und Ausgang der Therapie verändert?“                                                                |
| <input type="checkbox"/> | <input type="radio"/> | „Welche Auswirkungen hatte das Feedback auf die <b>Supervision</b> ?“                                                                  |
| <input type="checkbox"/> | <input type="radio"/> | „Welche Auswirkungen hatte das Feedback auf Ihre <b>Person</b> ?“                                                                      |
|                          | <input type="radio"/> | 1.) „Wie haben Sie sich als Therapeutin durch das Feedback verändert?“                                                                 |
|                          | <input type="radio"/> | ➤ „Welchen Einfluss hatte das Feedback auf Ihre therapeutischen Kompetenzen?“                                                          |
|                          | <input type="radio"/> | 2.) „Wie haben Sie sich privat und persönlich durch das Feedback verändert?“                                                           |
| <input type="checkbox"/> | <input type="radio"/> | „Welche Auswirkungen hatte das Feedback auf die <b>therapeutische Beziehung</b> zwischen Ihnen und Ihrer Patientin / Ihrem Patienten?“ |
| <input type="checkbox"/> | <input type="radio"/> | „Was für Konsequenzen ziehen Sie aus dem Feedback für die Zukunft?“                                                                    |
| <input type="checkbox"/> | <input type="radio"/> | „Haben Sie Verbesserungsvorschläge bezüglich des Feedbacks?“                                                                           |
| <input type="checkbox"/> | <input type="radio"/> | „Gibt es weitere Aspekte oder Anmerkungen Ihrerseits zum Feedback, die wir noch nicht besprochen haben?“                               |

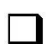

Frage wurde gestellt

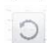

Thema vom Therapeuten angesprochen; ggf. nachfragen
